# Supplementary material for: Blood-Derived Extracellular Vesicle-Associated miR-3182 Detects Non-Small Cell Lung Cancer Patients
Source: MDPI journal article supplement (doi:10.3390/cancers14010257), 2022-01-05
Supplement: s1 [file s1]

| HBEC Line            | Enriched miRNAs  | <i>p</i> -value | Reduced miRNAs    | <i>p</i> -value |
|----------------------|------------------|-----------------|-------------------|-----------------|
| <b>KRAS</b>          | hsa-miR-4448-3p  | 2.91E-09        | hsa-miR-769-5p    | 2.68E-04        |
|                      | hsa-miR-423-3p   | 7.13E-05        | hsa-miR-4791-5p   | 3.89E-04        |
|                      | hsa-miR-4488-5p  | 7.23E-05        | hsa-miR-339-5p    | 6.80E-04        |
|                      | hsa-miR-423-5p   | 2.88E-04        |                   |                 |
|                      | hsa-miR-328-3p   | 3.79E-04        |                   |                 |
|                      | hsa-miR-3182-5p  | 6.33E-04        |                   |                 |
|                      | hsa-miR-224-5p   | 9.42E-04        |                   |                 |
|                      | hsa-miR-320a-3p  | 1.08E-03        |                   |                 |
| <b>p53/KRAS</b>      | hsa-miR-4448-3p  | 4.65E-13        | hsa-let-7c-5p     | 5.52E-06        |
|                      | hsa-miR-6131-3p  | 1.75E-08        | hsa-miR-100-5p    | 2.29E-05        |
|                      | hsa-miR-3182-5p  | 3.21E-08        | hsa-miR-4497-5p   | 4.82E-05        |
|                      | hsa-miR-1273a-5p | 9.14E-05        | hsa-miR-29b-1-3p  | 2.64E-04        |
|                      | hsa-miR-5585-3p  | 4.73E-04        | hsa-miR-125b-2-5p | 3.00E-04        |
|                      | hsa-miR-34b-3p   | 7.70E-04        | hsa-miR-654-3p    | 1.09E-03        |
|                      | hsa-miR-1273d-3p | 9.59E-04        | hsa-miR-221-3p    | 1.12E-03        |
|                      |                  |                 | hsa-miR-4791-5p   | 1.40E-03        |
|                      |                  |                 | hsa-miR-181b-1-5p | 1.43E-03        |
|                      |                  |                 |                   |                 |
| <b>p53/EGFR</b>      | hsa-miR-4448-3p  | 4.49E-12        | hsa-miR-3168-5p   | 1.31E-05        |
|                      | hsa-miR-3182-5p  | 3.10E-07        | hsa-miR-7641-1-3p | 4.92E-05        |
|                      | hsa-miR-6131-3p  | 3.92E-06        | hsa-miR-4497-5p   | 1.15E-04        |
| <b>p53/KRAS/LKB1</b> | hsa-miR-4448-3p  | 2.34E-07        | hsa-miR-92b-5p    | 1.52E-05        |
|                      | hsa-miR-34b-3p   | 1.55E-04        | hsa-miR-100-5p    | 9.19E-05        |
|                      | hsa-miR-3182-5p  | 4.35E-04        | hsa-miR-1289-1-3p | 2.38E-04        |
|                      | hsa-miR-200b-5p  | 5.63E-04        | hsa-miR-125b-2-5p | 3.79E-04        |
|                      | hsa-miR-200c-3p  | 8.34E-04        |                   |                 |

|                                   |                   | Invasive Breast Carcinoma |                 | Benign Fibroadenoma |
|-----------------------------------|-------------------|---------------------------|-----------------|---------------------|
|                                   |                   | ER <sup>+</sup>           | ER <sup>-</sup> |                     |
| Patient Age at Collection (years) |                   |                           |                 |                     |
|                                   | < 40              | 2                         | 3               | 14                  |
|                                   | 40-60             | 8                         | 8               | 5                   |
|                                   | 60-80             | 4                         | 9               | 1                   |
|                                   | > 80              | 2                         | -               | -                   |
|                                   | Median            | 54.9                      | 59.2            | 33.7                |
| Tumour Subtype                    |                   |                           |                 |                     |
|                                   | ER <sup>+</sup>   | 16                        | -               | NA                  |
|                                   | PR <sup>+</sup>   | 12                        | 2               | NA                  |
|                                   | HER2 <sup>+</sup> | 6                         | 1               | NA                  |
|                                   | TNBC              | -                         | 17              | NA                  |
| Tumour Size (mm)                  |                   |                           |                 |                     |
|                                   | Range             | 12-90                     | 3-80*           | NA                  |
|                                   | Median            | 25                        | 18              | NA                  |
| Tumour Grade (n)                  |                   |                           |                 |                     |
|                                   | 1                 | -                         | 1               | NA                  |
|                                   | 2                 | -                         | 1               | NA                  |
|                                   | 3                 | 16                        | 18              | NA                  |
| In Situ Disease (DCIS) (n)        |                   |                           |                 |                     |
|                                   |                   | 11                        | 13              | NA                  |
| Lymphovascular Invasion (n)       |                   |                           |                 |                     |
|                                   |                   | 3                         | 3               | NA                  |
| Multifocality (n)                 |                   |                           |                 |                     |
|                                   |                   | 3                         | 3               | NA                  |
| Multicentricity (n)               |                   |                           |                 |                     |
|                                   |                   | 2                         | 1               | NA                  |
| Lymph Node (n)                    |                   |                           |                 |                     |
|                                   | Positive          | 9                         | 8               | NA                  |
|                                   | Negative          | 7                         | 12              | NA                  |

\* Incomplete information available

| Benign Fibroadenoma | FDR-value | Invasive Breast Carcinoma | FDR-value |
|---------------------|-----------|---------------------------|-----------|
| hsa-miR-7-2-5p      | 7.34E-05  | hsa-miR-7641-1-3p         | 5.92E-06  |
| hsa-miR-7-1-5p      | 7.38E-05  | hsa-miR-375-3p            | 5.83E-05  |
| hsa-miR-7-3-5p      | 7.39E-05  | hsa-miR-7641-2-3p         | 1.06E-03  |
| hsa-miR-1-1-3p      | 1.31E-04  | hsa-miR-6131-3p           | 2.24E-03  |
| hsa-miR-1-2-3p      | 1.31E-04  | hsa-miR-423-5p            | 4.57E-03  |
| hsa-miR-184-3p      | 4.12E-04  | hsa-miR-3182-5p           | 7.22E-03  |
| hsa-miR-224-5p      | 3.93E-03  | hsa-miR-146a-5p           | 9.32E-03  |
| hsa-miR-1246-5p     | 4.15E-03  | hsa-miR-409-3p            | 1.36E-02  |
| hsa-miR-27a-3p      | 1.58E-02  | hsa-miR-4433b-3p          | 1.39E-02  |
| hsa-miR-130b-3p     | 2.32E-02  | hsa-miR-320a-3p           | 1.41E-02  |
| hsa-miR-105-1-5p    | 2.78E-02  | hsa-miR-4488-5p           | 1.61E-02  |
| hsa-miR-105-2-5p    | 2.78E-02  | hsa-miR-4492-3p           | 1.72E-02  |
| hsa-miR-582-3p      | 3.10E-02  | hsa-miR-625-3p            | 1.77E-02  |
| hsa-miR-204-5p      | 3.31E-02  | hsa-miR-1273h-3p          | 2.10E-02  |
| hsa-miR-454-3p      | 3.61E-02  | hsa-miR-328-3p            | 2.43E-02  |
| hsa-miR-31-5p       | 4.36E-02  | hsa-miR-654-3p            | 2.96E-02  |
| hsa-miR-365a-3p     | 4.50E-02  | hsa-miR-3960-3p           | 3.93E-02  |
| hsa-miR-365b-3p     | 4.73E-02  | hsa-miR-3615-3p           | 3.98E-02  |
|                     |           | hsa-miR-148a-3p           | 4.47E-02  |
|                     |           | hsa-miR-148a-5p           | 4.53E-02  |
|                     |           | hsa-miR-3168-5p           | 4.59E-02  |
|                     |           | hsa-miR-505-5p            | 4.72E-02  |
|                     |           | hsa-miR-136-3p            | 4.85E-02  |

|                                   |        | NSCLC | Benign |
|-----------------------------------|--------|-------|--------|
| Patient Age at Collection (years) | 40-60  | 2     | 4      |
|                                   | 60-80  | 9     | 10     |
|                                   | >80    | 1     | -      |
| Gender                            | Male   | 6     | 7      |
|                                   | Female | 6     | 7      |
| Tumour Stage (TNM)                | IA1    | 1     | NA     |
|                                   | IA2    | 3     | NA     |
|                                   | IA3    | 1     | NA     |
|                                   | IB     | 6     | NA     |
|                                   | IIIA   | 1     | NA     |
| Lymph Node Status                 | N0     | 11    | NA     |
|                                   | N1     | -     | NA     |
|                                   | N2     | 1     | NA     |
