# Supplementary figures and images for: Blood-Derived Extracellular Vesicle-Associated miR-3182 Detects Non-Small Cell Lung Cancer Patients
Source: MDPI journal article supplement (doi:10.3390/cancers14010257), 2022-01-05

**Calnexin**

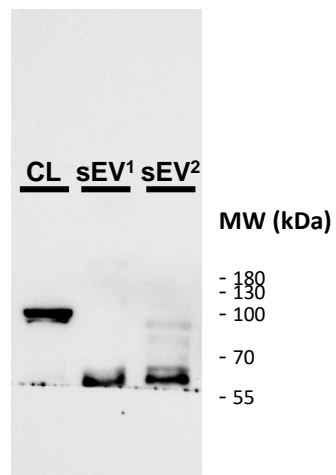

**HSP70**

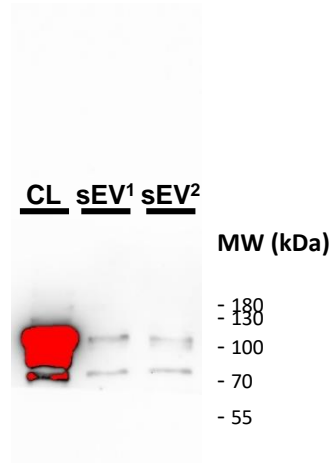

**$\alpha$  CD9**

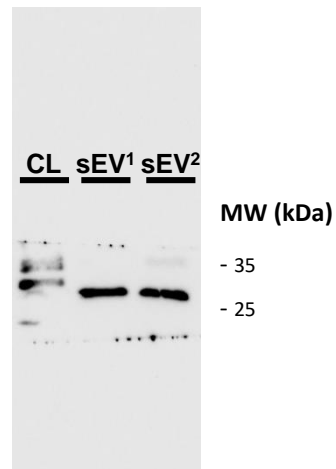

Supplement: s1 [file s1]
